# Supplementary material for: Design and characterization of protective pan-ebolavirus and pan-filovirus bispecific antibodies
Source: PubMed Central journal article supplement (PMC11037526; doi:10.1371/journal.ppat.1012134), 2024-04-11
Supplement: ppat.1012134.s001.pdf [file ppat.1012134.s001.pdf]

| <b>Table S1 – bsAb Design</b> |              |                |                       |                       |
|-------------------------------|--------------|----------------|-----------------------|-----------------------|
| <b>Name</b>                   | <b>Group</b> | <b>Format</b>  | <b>Added Fv (Ab2)</b> | <b>Parental (Ab1)</b> |
| DV_A774-A878                  | I            | DVD-IgG        | ADI-23774             | ADI-15878             |
| SC_A774-A878                  | I            | C' scFv-IgG    | ADI-23774             | ADI-15878             |
| hSC_A774-A878                 | I            | hinge scFv-IgG | ADI-23774             | ADI-15878             |
| AS_A774-A878                  | I            | Duobody        | ADI-23774             | ADI-15878             |
| DV_A878-A774                  | I            | DVD-IgG        | ADI-15878             | ADI-23774             |
| SC_A878-A774                  | I            | C' scFv-IgG    | ADI-15878             | ADI-23774             |
| hSC_A878-A774                 | I            | hinge scFv-IgG | ADI-15878             | ADI-23774             |
| DV_A878-A061                  | I            | DVD-IgG        | ADI-15878             | ADI-16061             |
| DV_A061-A774                  | I            | DVD-IgG        | ADI-16061             | ADI-23774             |
| SC_A878-MR72                  | II           | C' scFv-IgG    | ADI-15878             | MR72                  |
| DV_A878-MR72                  | II           | DVD-IgG        | ADI-15878             | MR72                  |
| SC_MR72-A878                  | II           | C' scFv-IgG    | MR72                  | ADI-15878             |
| AS_A878-MR72                  | II           | Duobody        | ADI-15878             | MR72                  |
| AS_A774-MR72                  | II           | Duobody        | ADI-23774             | MR72                  |
| SC_MR72-A774                  | II           | C' scFv-IgG    | MR72                  | ADI-23774             |
| SC_A774-MR72                  | II           | C' scFv-IgG    | ADI-23774             | MR72                  |
| DV_A878-MR191                 | III          | DVD-IgG        | ADI-15878             | MR191                 |
| SC_A878-MR191                 | III          | C' scFv-IgG    | ADI-15878             | MR191                 |
| hSC_A878-MR191                | III          | hinge scFv-IgG | ADI-15878             | MR191                 |
| DV_MR191-A878                 | III          | DVD-IgG        | MR191                 | ADI-15878             |
| SC_MR191-A878                 | III          | C' scFv-IgG    | MR191                 | ADI-15878             |
| hSC_MR191_A878                | III          | hinge scFv-IgG | MR191                 | ADI-15878             |
| AS_A878-MR191                 | III          | Duobody        | ADI-15878             | MR191                 |
| AS_A774-MR191                 | III          | Duobody        | ADI-23774             | MR191                 |
| DV_MR191-A774                 | III          | DVD-IgG        | MR191                 | ADI-23774             |
| SC_MR191-A774                 | III          | C' scFv-IgG    | MR191                 | ADI-23774             |
| hSC_MR191-A774                | III          | hinge scFv-IgG | MR191                 | ADI-23774             |
| SC_A774-MR191                 | III          | C' scFv-IgG    | ADI-23774             | MR191                 |
| hSC__A774-MR191               | III          | hinge scFv-IgG | ADI-23774             | MR191                 |
