# Supplementary material for: Design and characterization of protective pan-ebolavirus and pan-filovirus bispecific antibodies
Source: PubMed Central journal article supplement (PMC11037526; doi:10.1371/journal.ppat.1012134), 2024-04-11
Supplement: ppat.1012134.s002.pdf [file ppat.1012134.s002.pdf]

**Table S2 – Biolayer Interferometry for binding EBOV GP**

| <b>Antibody</b> | <b>K<sub>D</sub><sup>app</sup> (M)</b> | <b>k<sub>on</sub> (M s)<sup>-1</sup></b> | <b>k<sub>off</sub> (s<sup>-1</sup>)</b> |
|-----------------|----------------------------------------|------------------------------------------|-----------------------------------------|
| ADI-15878       | < 1.0 x 10 <sup>-12</sup>              | (4.49 ± 0.03) x 10 <sup>4</sup>          | < 1.0 x 10 <sup>-7</sup>                |
| ADI-23774       | (3.0 ± 0.7) x 10 <sup>-10</sup>        | (2.72 ± 0.02) x 10 <sup>4</sup>          | (8.2 ± 2.0) x 10 <sup>-6</sup>          |
| DV_A774-A878    | (2.8 ± 0.2) x 10 <sup>-10</sup>        | (5.93 ± 0.08) x 10 <sup>4</sup>          | (1.7 ± 0.1) x 10 <sup>-4</sup>          |
| SC_A774-A878    | < 1.0 x 10 <sup>-12</sup>              | (1.69 ± 0.02) x 10 <sup>4</sup>          | < 1.0 x 10 <sup>-7</sup>                |
| DV_A878-MR72    | (8.1 ± 0.2) x 10 <sup>-9</sup>         | (2.27 ± 0.02) x 10 <sup>4</sup>          | (1.8 ± 0.1) x 10 <sup>-4</sup>          |
| SC_MR72-A878    | < 1.0 x 10 <sup>-12</sup>              | (1.08 ± 0.02) x 10 <sup>4</sup>          | < 1.0 x 10 <sup>-7</sup>                |
| DV_A878-MR191   | < 1.0 x 10 <sup>-12</sup>              | (1.92 ± 0.06) x 10 <sup>4</sup>          | < 1.0 x 10 <sup>-7</sup>                |
| hSC_MR191-A878  | < 1.0 x 10 <sup>-12</sup>              | (3.39 ± 0.10) x 10 <sup>4</sup>          | < 1.0 x 10 <sup>-7</sup>                |
| SC_MR191-A774   | < 1.0 x 10 <sup>-12</sup>              | (2.80 ± 0.10) x 10 <sup>4</sup>          | < 1.0 x 10 <sup>-7</sup>                |
| hSC_MR191-A774  | (5.2 ± 0.6) x 10 <sup>-10</sup>        | (3.57 ± 0.03) x 10 <sup>4</sup>          | (1.9 ± 0.2) x 10 <sup>-5</sup>          |
