# Supplementary material for: Design and characterization of protective pan-ebolavirus and pan-filovirus bispecific antibodies
Source: PubMed Central journal article supplement (PMC11037526; doi:10.1371/journal.ppat.1012134), 2024-04-11
Supplement: ppat.1012134.s003.pdf [file ppat.1012134.s003.pdf]

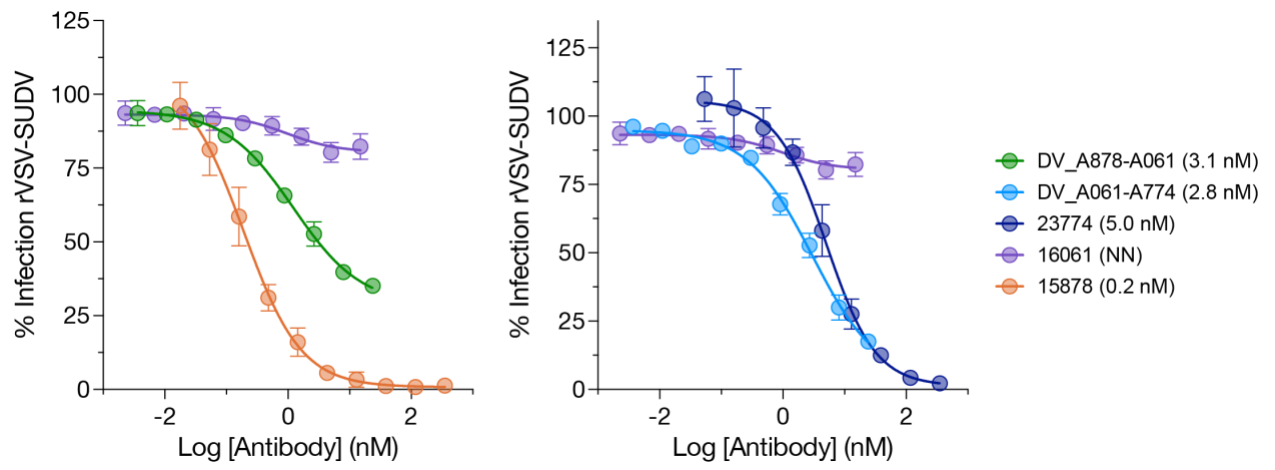

**Figure S1. Neutralization studies against rVSV-SUDV for A061 Fv-containing bsAbs. IC<sub>50</sub> values indicated in the parentheses in the legend.**
