# Supplementary material for: Design and characterization of protective pan-ebolavirus and pan-filovirus bispecific antibodies
Source: PubMed Central journal article supplement (PMC11037526; doi:10.1371/journal.ppat.1012134), 2024-04-11
Supplement: ppat.1012134.s004.pdf [file ppat.1012134.s004.pdf]

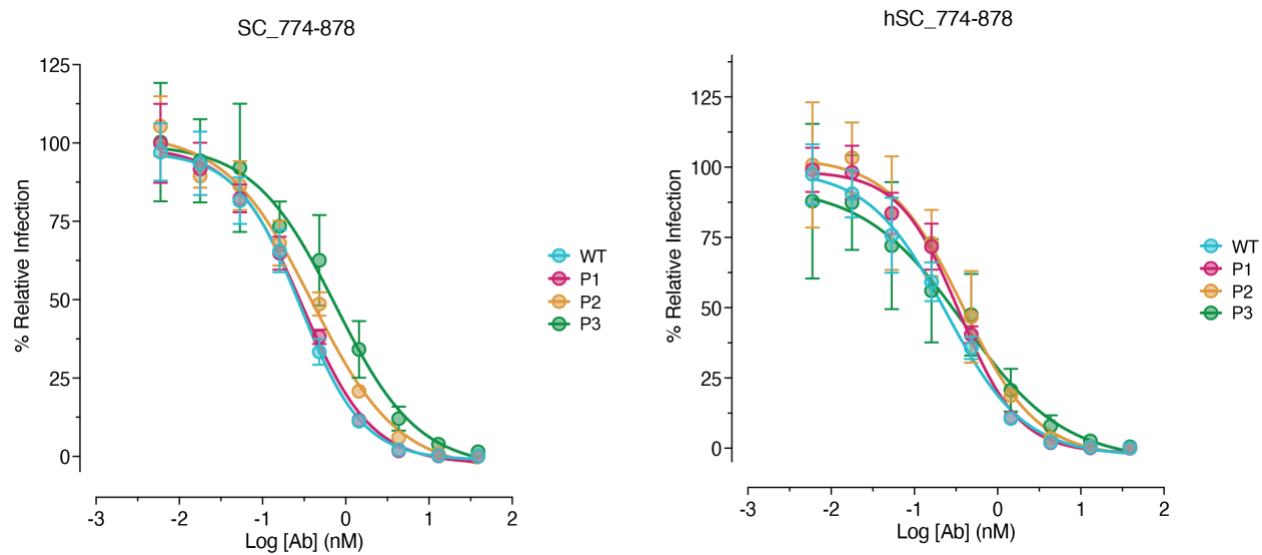

**Figure S2. Passage of rVSV-EBOV against bsAbs.** Neutralization of viral populations from three passages (P1-P3) for bsAbs.
